# Supplementary material for: Identification and Validation of Magnolol Biosynthesis Genes in Magnolia officinalis
Source: MDPI journal article supplement (doi:10.3390/molecules29030587), 2024-01-25
Supplement: s1 [file s1]

# Identification and validation of magnolol biosynthesis genes in *Magnolia officinalis*

Yue Yang<sup>1,†</sup>, Zihe Li<sup>1,†</sup>, Hang Zong<sup>1</sup>, Shimeng Liu<sup>2</sup>, Qiuhui Du<sup>2</sup>, Hao Wu<sup>2</sup>, Zhenzhu Li<sup>1</sup>,  
Xiao Wang<sup>2</sup>, Lihui Huang<sup>2</sup>, Changlong Lai<sup>2</sup>, Meide Zhang<sup>3</sup>, Wen Wang<sup>1,\*</sup>, Xianqing Chen<sup>2,\*</sup>

Additional files

Table S1 RNA Sampling and Raw Data Quality;

Table S2 Gene Annotation Status;

Table S3 Differential Expression Analysis;

Table S4 Genes list from *Magnolia officinalis* derived from this work;

Table S5 Plasmids collection derived from this study;

Table S6 Strains inventory from this study;

Table S7 Gene expression levels related to the conversion of tyrosine into chavicol;

Figure S1 Principal Component Analysis between tissues and ages;

Figure S2 GO Enrichment Analysis in Biological Processes;

Figure S3 GO Enrichment Analysis in Cellular Components;

Figure S4 GO Enrichment Analysis in Molecular Functions;

Figure S5 30 potential laccase genes identified in *M. officinalis* by transcriptome analysis;

Figure S6 Comparative analysis of the laccase gene family in *M. officinalis* versus *Arabidopsis thaliana* and other closely related species;

Figure S7 MS analysis of the by-product. Its Molecular formula was C<sub>27</sub>H<sub>26</sub>O<sub>3</sub> (RT= 13.8 min), hypothesized to be the trimer Dunnianol or its isomer, derived from chavicol;

Figure S8 The influence of heat treatment time on thermal stability and Alanine scanning of residues within 5 Å of the substrate for MoLAC14;

Figure S9 Genes with multiple copies involved in the synthesis from tyrosine to magnolol.

Table S1 RNA Sampling and Raw Data Quality

| Sampling Tissue          | Sample Name | total data<br>(Gb) | mapping rate | Q30 reads rate |
|--------------------------|-------------|--------------------|--------------|----------------|
| 16-year-old tree leaves  | l16_1       | 7.02               | 83.83%       | 97.65%         |
| 16-year-old tree leaves  | l16_2       | 7.52               | 80.98%       | 97.92%         |
| 16-year-old tree leaves  | l16_3       | 7.07               | 82.99%       | 97.70%         |
| 16-year-old tree leaves  | l16_4       | 7.47               | 83.10%       | 97.84%         |
| 16-year-old tree bark    | e16_1       | 8.11               | 86.16%       | 97.24%         |
| 16-year-old tree bark    | e16_2       | 7.89               | 86.67%       | 97.28%         |
| 16-year-old tree bark    | e16_3       | 5.08               | 86.34%       | 97.32%         |
| 16-year-old tree bark    | e16_4       | 6.18               | 84.97%       | 97.22%         |
| 16-year-old tree roots   | r16_1       | 7.24               | 86.14%       | 97.20%         |
| 16-year-old tree roots   | r16_3       | 7.17               | 86.24%       | 97.17%         |
| 16-year-old tree roots   | r16_4       | 6.67               | 85.69%       | 97.47%         |
| 2-5 year-old tree leaves | l2_1        | 6.88               | 79.65%       | 97.77%         |
| 2-5 year-old tree leaves | l2_2        | 6.88               | 83.89%       | 97.75%         |
| 2-5 year-old tree leaves | l2_3        | 7.41               | 83.57%       | 97.54%         |
| 2-5 year-old tree bark   | e2_1        | 7.15               | 78.69%       | 97.73%         |
| 2-5 year-old tree bark   | e2_2        | 8.49               | 78.60%       | 98.04%         |
| 2-5 year-old tree bark   | e2_3        | 8.63               | 79.67%       | 97.97%         |
| 2-5 year-old tree roots  | r2_1        | 8.82               | 77.43%       | 97.86%         |
| 2-5 year-old tree roots  | r2_2        | 9                  | 86.14%       | 97.98%         |
| 2-5 year-old tree roots  | r2_3        | 7.09               | 85.25%       | 98.02%         |

Table S2 Gene Annotation Status

| Gene Annotation Status        | Number |
|-------------------------------|--------|
| Number of Genes               | 19946  |
| Number of mRNA                | 52692  |
| Average Length of CDS         | 1224bp |
| Complete BUSCOs % of proteins | 79.30% |
| Complete BUSCOs % of genome   | 86.20% |

Table S3 Differential Expression Analysis

| Analysis Groups for Differential Comparisons | Up/Down Regulation | Number of Differentially Expressed Genes |
|----------------------------------------------|--------------------|------------------------------------------|
| e16 vs e2                                    | down               | 1563                                     |
| e16 vs e2                                    | up                 | 682                                      |
| e16 vs l16                                   | down               | 4685                                     |
| e16 vs l16                                   | up                 | 3698                                     |
| e16 vs r16                                   | down               | 394                                      |
| e16 vs r16                                   | up                 | 356                                      |
| e2 vs l2                                     | down               | 3394                                     |
| e2 vs l2                                     | up                 | 3373                                     |
| e2 vs r2                                     | down               | 2280                                     |
| e2 vs r2                                     | up                 | 1264                                     |
| l16 vs l2                                    | down               | 191                                      |
| l16 vs l2                                    | up                 | 587                                      |
| r16 vs l16                                   | down               | 4139                                     |
| r16 vs l16                                   | up                 | 3428                                     |
| r16 vs r2                                    | down               | 1573                                     |
| r16 vs r2                                    | up                 | 371                                      |
| r2 vs l2                                     | down               | 3157                                     |
| r2 vs l2                                     | up                 | 4439                                     |

Table S4. Genes list from *Magnolia officinalis* derived from this work

| Gene name | Amino acid sequence                                                                                                                                                                                                                                                                                                                                                                                                                                                                                                                                                                                                    |
|-----------|------------------------------------------------------------------------------------------------------------------------------------------------------------------------------------------------------------------------------------------------------------------------------------------------------------------------------------------------------------------------------------------------------------------------------------------------------------------------------------------------------------------------------------------------------------------------------------------------------------------------|
| MoSKU5F   | MTPTVNAKILRYKWDVKYQFKAPDCYRKLVIANGKTPGPTILAQQ<br>GDTIIVELKNSLLTENVAIHWHGIRQIGTPWSDGTEGVSQCPITPGDTF<br>VYKFVVDPRPGTYLYHAHYGMQREAGLYGSIRVSVPEGKTEPFTYDY<br>DRSIILTDWWHKSTYEQATGLSSLPFQWVNEPQSLLIQKGKRFDCSLV<br>TPSSSNISEICNASDPECGHYVLTVVPKGTYRLRIASLTSLSALNFEIEG<br>HNMTVVEADGHYVEPFIIKDLHIYSGETYSVLVKADQDPSRNYWATT<br>NVVSREPKTPTGLAIFNYYPNHPRKLPTTTPPTGPLWNDTNVRLAQS<br>LKIKSHKGYIHQPPLTSDRVMILLNTQNRINGFVRWSINNVSFITLPHPT<br>YLIALKENLTNVFDQTPPPETYDYANYNIYSTPNNTNASSTNSIYRLQ<br>FNSTVDIILQNANMMDPNKSETHPWHLHGHDFWVLGYGDGVFDPV<br>NDPKKYNLVDPMKNTVPVHPYGTALRFQADNPGVWAFHCHIEA<br>HYLGMGVVFEEGVEKVGKLPSSIMGCGETKGFKRP |
| MoLAC7B   | MIFFFFLNFHFQVGNLTVKPLCEERVVAVNGQLPGPTISVREGDTL<br>VVHVINESPYNVTIHWGIFQQLTGWADGPAYVTQCPILPGDSYTYR<br>FNIIKQQGTLWWHAHVSWLRATVYGALIIHPRQHRPYPFIKPHKQFPI<br>ILGEWWNANVVDVENEARLNGVAPNISDAYTINGRPGDLYPCANN<br>TYKIQVAHGKTYLLRIINAALNNELFFKIAGHNLTVVGIDALYTDPYT<br>TDVVVLAPGQTTGVLLVANATPGSYMAAHPYATAPIFDNTTTTAIL<br>QYKGATSVAAPLMPVLPQFNDTPTAHKFYSNITALSRRGSEVPLHVD<br>EHMFITVGLGLEPCGQNATCTRAASMNNASFQLPTTSLMLQAHFSG<br>VKGIYTDDFPDTPPLVFDYTNANASQLVSTTLKSTRVKRLAYNTTVE<br>MVFQNTAILSVENHPIHLHGFNFFVVAQGFGNYDNTTHRNMFNLVN<br>PQRRNTIAVPVGGWAVVRFQANNPGVWLMHCHLDVHLTWGLATAF<br>VVDNGPTISSTLPPPPDLPRC                        |
| MoLAC4A   | MKNTRRLCQSKPIVTVNGQFPGPTLYAREGDNVLVKVNVNHVKYNVT<br>IHWGIRQFRGTGWADGPAYITQCPIQPRNQYIYNFTITGQRGTLWWH<br>AHILWLRATVHGAFVILPNLPAPYVPYPFPTPDKEVVVILGEWWKSDI<br>EVIDESLNSGVSPNVSDAHTINGHPGPFSSNCSSNGGFTLKVRRGKTY<br>MLRVINAALNDELFFKVAGHKLTVVEVDATYTKPFKTDLLITPGQT<br>TNVLLTADRVPGRYLVVVSFVKDSPIVDNTTGTAILHYSGMLGALPT<br>TLTTPPPQNATPVATNFNAALRSLNSKKFPANVPLTVDHSLFTVGVG<br>FIPCSTCNNGKRLVVFTSDFPGNPITFNYTGTLPSNPRTTNGTRLYRL<br>AYNSTVQIVFQDTTFISPENHPIHLHGFNFFAVGRGLGNFNPKTDTAN<br>FNLVDPVERNTIGVPSGGWTAIRFRADNPGVWFLHCHLEVHTTWGL<br>KMAFVVDNGKGPNQSLPPPSDLPAC                                                              |
| MoLAC4B   | MELWVRALVLVACLLLPTVVECRVRHYKFNVVMKNTRRLCQSKPIV<br>TVNGQFPGPTLYAREGDNVVVKVNVNHVKYNVTVHWHGIRQLRTG<br>WADGPAYITQCPIQPGNQYIYNFTITGQRGTLWWHAHILWLRATVHG                                                                                                                                                                                                                                                                                                                                                                                                                                                                     |

---

AIVILPKLRVPYVPCEWWKSDTEAVINEALNSGLAPNVSDAHTINGH  
PGPFSNCSSQGGFTLKVRRGKTYMLRLINAALNDELFFKVAGHKLT  
VEVDAAYTKPFKTDTVLIAPGQTTNVLLTTDRAPGRYLVAVSPFMD  
PIAVDNTTGTAILHYSGMLGASPTTLTTPPPQNATPIATNFNAALRSL  
SKKFPANVPLTVDHSLFTVGLGVSPCSTCKNGIRVAADINNVSFVMP  
TTALLQAHYFNISGVFTNDSPAIRRSPTPVQCLRTCKPQMGLGFIG  
WRTIQRCLSLCKIPALYRQKTIRSTFTVSISSPSVGGGEFQSKERYR

MoLAC17F MATVNGRYPGPKIMAREGDRVVEVANNVQNNVTIHWHGIRQLQS  
GWADGPAYITQCPIQTGQTYVYNFTITGQRGTLFWHAHFSWMRATL  
YGPLIVLPMQNASYPFGQPDEEVPIIFGEWWNANTEAVINQSLQTGA  
GPNVSDAYTINGKPGPLYNCSAKDTFKLKVKPGKTYLLRLINAALND  
ELFFSIANHTITVVEVDAIYIKPFNTKTILIAPGQTTNVLLNTKPHYPN  
ATFFMSARPYLTLGLGTFDNTTTVGLLEYEKPNSSLPSTNLPIFKPSLPA  
LNDTSYAANYSQLRSLANSQFPANVPLTVDKRFFFTIGLGADPCPK  
NQTCQGPNGTKFSASINNISFVLPTTALLQAHFFGQSNGVYNTSFPNN  
PPLPHGTKVVLVPFNTTVELVLQDTSILGVESHPLHLHGFNFFVVGQ  
GFGNFDRKKDKPAKFNLVDPIERNTVGVPSGGWVVLRFADNPGVWF  
LHCHFDVHLSWGLKMAWVVLGDGKLPNQKLLPPPSDLPKC

MoLAC14 MATVNGRYPGPKIMAREGDRVVEVANNVQNNVTIHWHGIRQLQS  
GWADGPAYITQCPIQTGQTYVYNFTITGQRGTLFWHAHFSWMRATL  
YGPLIVLPMQNASYPFGQPDEEVPIIFGEWWNANTEAVINQSLQTGA  
GPNVSDAYTINGKPGPLYNCSAKDTFKLKVKPGKTYLLRLINAALND  
ELFFSIANHTITVVEVDAIYIKPFNTKTILIAPGQTTNVLLNTKPHYPN  
ATFFMSARPYLTLGLGTFDNTTTVGLLEYEKPNSSLPSTNLPIFKPSLPA  
LNDTSYAANYSQLRSLANSQFPANVPLTVDKRFFFTIGLGADPCPK  
NQTCQGPNGTKFSASINNISFVLPTTALLQAHFFGQSNGVYNTSFPNN  
PPLPHGTKVVLVPFNTTVELVLQDTSILGVESHPLHLHGFNFFVVGQ  
GFGNFDRKKDKPAKFNLVDPIERNTVGVPSGGWVVLRFADNPGVWF  
LHCHFDVHLSWGLKMAWVVLGDGKLPNQKLLPPPSDLPKCLEHHHH  
HHEF

---

Table S5 Plasmids collection derived from this study

| Plasmids         | Genotype                            |
|------------------|-------------------------------------|
| pET28a           | pBR322 ori with pT7; KanR           |
| pET28a- MoSKU5F  | pET28a vector, NdeI- MoSKU5F -XhoI  |
| pET28a-MoLAC7B   | pET28a vector, NdeI- MoLAC7B -XhoI  |
| pET28a - MoLAC4A | pET28a vector, NdeI- MoLAC4A -XhoI  |
| pET28a- MoLAC4B  | pET28a vector, NdeI- MoLAC4B -XhoI  |
| pET28a -MoLAC17F | pET28a vector, NdeI- MoLAC17F -XhoI |
| pET28a -MoLAC14  | pET28a vector, NdeI- MoLAC14 -XhoI  |

Table S6 Strains inventory from this study

| Strains   | Genotype                               |
|-----------|----------------------------------------|
| BL21(DE3) | F-; ompT; hsdS (rBB-mB—);gal;dcm (DE3) |
| S5F       | BL21(DE3) carrying pET28a- MoSKU5F     |
| S7B       | BL21(DE3) carrying pET28a-MoLAC7B      |
| S4A       | BL21(DE3) carrying pET28a - MoLAC4A    |
| S4B       | BL21(DE3) carrying pET28a- MoLAC4B     |
| S17F      | BL21(DE3) carrying pET28a -MoLAC17F    |
| S14       | BL21(DE3) carrying pET28a -MoLAC14     |



Table S7 Gene expression levels related to the conversion of tyrosine into chavicol

| Gene name | Adjust p value | Log2(Fold change) | Group      | Type |
|-----------|----------------|-------------------|------------|------|
| Mo4CL1    | 0.00011        | -2.65164          | e2 vs l2   | DOWN |
| Mo4CL1    | 0.00038        | -2.63430          | e2 vs r2   | DOWN |
| Mo4CL1    | 0.03563        | -1.83893          | e16 vs r16 | DOWN |
| Mo4CL1    | 0.00003        | -2.41695          | e16 vs l16 | DOWN |
| Mo4CL2    | 0.00153        | 3.05158           | r16 vs l16 | UP   |
| Mo4CL2    | 0.00198        | -3.73052          | e16 vs r16 | DOWN |
| Mo4CL2    | 0.00002        | 4.31002           | r2 vs l2   | UP   |
| Mo4CL2    | 0.00009        | -4.32183          | e2 vs r2   | DOWN |
| Mo4CL3    | 0.01355        | -1.01245          | e2 vs r2   | DOWN |
| Mo4CL3    | 0.00001        | -1.57914          | e2 vs l2   | DOWN |
| Mo4CL3    | 0.00004        | -1.25750          | e16 vs l16 | DOWN |
| MoADH1    | 0.00000        | 5.25155           | r2 vs l2   | UP   |
| MoADH1    | 0.00000        | 6.57484           | r16 vs l16 | UP   |
| MoADH1    | 0.00000        | 7.54652           | e16 vs l16 | UP   |
| MoADH1    | 0.00000        | 6.12294           | e2 vs l2   | UP   |
| MoADH2    | 0.00018        | 5.68845           | e2 vs l2   | UP   |
| MoADH2    | 0.00609        | 4.22823           | r2 vs l2   | UP   |
| MoADH2    | 0.00001        | 5.23369           | e16 vs l16 | UP   |
| MoADH5    | 0.00018        | -8.17421          | e2 vs l2   | DOWN |
| MoADH5    | 0.00471        | -6.84306          | e2 vs r2   | DOWN |
| MoADH5    | 0.00754        | -6.94765          | r16 vs r2  | DOWN |
| MoADH5    | 0.00005        | -8.11174          | r16 vs l16 | DOWN |
| MoADH5    | 0.00000        | -12.68389         | e16 vs l16 | DOWN |
| MoADH6    | 0.00717        | 1.45115           | r16 vs l16 | UP   |
| MoADH6    | 0.01044        | 1.49143           | r2 vs l2   | UP   |
| MoADH7    | 0.00195        | -1.46646          | e16 vs r16 | DOWN |
| MoADH7    | 0.00336        | 1.27271           | e16 vs e2  | UP   |
| MoADH7    | 0.00000        | 6.70898           | r16 vs l16 | UP   |
| MoADH7    | 0.00000        | 5.24252           | e16 vs l16 | UP   |
| MoADH7    | 0.00000        | -2.12274          | e2 vs r2   | DOWN |
| MoADH7    | 0.00000        | 3.81390           | e2 vs l2   | UP   |
| MoADH7    | 0.00000        | 5.93664           | r2 vs l2   | UP   |
| MoADH8    | 0.02773        | -2.18813          | r16 vs r2  | DOWN |
| MoADH8    | 0.00000        | -5.29536          | r16 vs l16 | DOWN |
| MoADH8    | 0.00000        | -4.82515          | e2 vs l2   | DOWN |
| MoADH8    | 0.00001        | -3.49974          | r2 vs l2   | DOWN |
| MoADH8    | 0.00000        | -4.49300          | e16 vs l16 | DOWN |
| MoAPS2    | 0.00003        | 1.85022           | r2 vs l2   | UP   |
| MoAPS2    | 0.00000        | 3.24434           | r16 vs l16 | UP   |
| MoAPS2    | 0.00000        | 2.57820           | e2 vs l2   | UP   |
| MoAPS2    | 0.00000        | 3.91400           | e16 vs l16 | UP   |

|          |         |          |            |      |
|----------|---------|----------|------------|------|
| MoAPS3   | 0.00037 | 1.43570  | e2 vs l2   | UP   |
| MoAPS3   | 0.00217 | 1.23928  | r2 vs l2   | UP   |
| MoCAAT1A | 0.00088 | -3.71703 | r16 vs l16 | DOWN |
| MoCAAT1A | 0.00220 | -4.24963 | r16 vs r2  | DOWN |
| MoCAAT1A | 0.00537 | -3.68754 | e2 vs r2   | DOWN |
| MoCAAT1A | 0.00000 | -5.14052 | e16 vs l16 | DOWN |
| MoCAAT1B | 0.00441 | -7.55774 | e2 vs r2   | DOWN |
| MoCAAT1B | 0.02631 | 5.06656  | r16 vs l16 | UP   |
| MoCAAT1B | 0.00000 | 26.31881 | r2 vs l2   | UP   |
| MoCAAT1B | 0.00000 | 21.98887 | l16 vs l2  | UP   |
| MoCAAT1B | 0.00000 | 18.76107 | e2 vs l2   | UP   |
| MoCAAT1C | 0.00023 | 6.82140  | e2 vs l2   | UP   |
| MoCAAT1C | 0.00360 | 4.95372  | r16 vs l16 | UP   |
| MoCAAT1C | 0.01070 | -4.15200 | r16 vs r2  | DOWN |
| MoCAAT1C | 0.02583 | -3.67866 | e16 vs e2  | DOWN |
| MoCAAT1C | 0.00000 | 8.97930  | r2 vs l2   | UP   |
| MoCAAT2A | 0.00038 | 7.96667  | r16 vs l16 | UP   |
| MoCAAT2A | 0.00047 | 8.60809  | r2 vs l2   | UP   |
| MoCAAT2A | 0.03552 | 4.63246  | e16 vs l16 | UP   |
| MoCAAT2B | 0.00034 | -4.72147 | r16 vs r2  | DOWN |
| MoCAAT2B | 0.00061 | 3.97621  | r16 vs l16 | UP   |
| MoCAAT2B | 0.01377 | -3.76108 | e16 vs r16 | DOWN |
| MoCAAT2B | 0.04394 | -2.72911 | e2 vs r2   | DOWN |
| MoCAAT2B | 0.00000 | 8.43717  | e2 vs l2   | UP   |
| MoCAAT2B | 0.00000 | -5.75344 | e16 vs e2  | DOWN |
| MoCAAT2B | 0.00000 | 11.16628 | r2 vs l2   | UP   |
| MoCCR1   | 0.00983 | 1.11009  | e16 vs l16 | UP   |
| MoCCR2   | 0.00000 | 2.53627  | e16 vs l16 | UP   |
| MoCCR2   | 0.00000 | 2.56286  | e2 vs l2   | UP   |
| MoCCR2   | 0.00000 | 1.98188  | e16 vs r16 | UP   |
| MoCCR2   | 0.00000 | 2.08770  | e2 vs r2   | UP   |
| MoCCR4   | 0.00073 | -2.76387 | e16 vs l16 | DOWN |
| MoCCR4   | 0.00253 | -3.37222 | r16 vs r2  | DOWN |
| MoCCR4   | 0.01955 | -2.55152 | e2 vs r2   | DOWN |
| MoCCR4   | 0.02436 | -2.08095 | r16 vs l16 | DOWN |
| MoCCR5   | 0.00056 | -2.65549 | r2 vs l2   | DOWN |
| MoCCR5   | 0.00711 | -2.33089 | e2 vs r2   | DOWN |
| MoCCR5   | 0.00000 | -6.08362 | r16 vs l16 | DOWN |
| MoCCR5   | 0.00002 | -3.49136 | e16 vs e2  | DOWN |
| MoCCR5   | 0.00000 | -4.98637 | e2 vs l2   | DOWN |
| MoCCR5   | 0.00000 | -4.16135 | r16 vs r2  | DOWN |
| MoCCR5   | 0.00000 | -7.74451 | e16 vs l16 | DOWN |
| MoCCR7   | 0.00020 | -1.73743 | e2 vs l2   | DOWN |
| MoCCR7   | 0.00213 | -1.34297 | r16 vs l16 | DOWN |

|          |         |           |            |      |
|----------|---------|-----------|------------|------|
| MoCCR7   | 0.00005 | -1.58691  | e16 vs l16 | DOWN |
| MoLAC11  | 0.00225 | 9.28048   | e2 vs l2   | UP   |
| MoLAC11  | 0.00462 | 8.57096   | r2 vs l2   | UP   |
| MoLAC11B | 0.00312 | 10.68263  | r2 vs l2   | UP   |
| MoLAC11C | 0.00834 | -7.08054  | r16 vs r2  | DOWN |
| MoLAC11C | 0.01036 | -6.46246  | e2 vs r2   | DOWN |
| MoLAC11C | 0.00005 | 9.40439   | r2 vs l2   | UP   |
| MoLAC12  | 0.00012 | 4.72317   | r2 vs l2   | UP   |
| MoLAC12  | 0.00112 | -4.41414  | e2 vs r2   | DOWN |
| MoLAC12  | 0.03048 | -2.36973  | e16 vs l16 | DOWN |
| MoLAC12  | 0.03447 | -3.36139  | e16 vs r16 | DOWN |
| MoLAC14  | 0.01384 | -1.34620  | e16 vs e2  | DOWN |
| MoLAC14  | 0.02908 | -1.24033  | e2 vs r2   | DOWN |
| MoLAC14  | 0.00000 | -3.09393  | e16 vs r16 | DOWN |
| MoLAC14  | 0.00000 | -4.80067  | e2 vs l2   | DOWN |
| MoLAC14  | 0.00000 | -3.56035  | r2 vs l2   | DOWN |
| MoLAC14  | 0.00000 | -5.81968  | e16 vs l16 | DOWN |
| MoLAC14  | 0.00000 | -2.72575  | r16 vs l16 | DOWN |
| MoLAC17A | 0.00391 | -7.23990  | r16 vs l16 | DOWN |
| MoLAC17A | 0.00000 | 21.09820  | e2 vs l2   | UP   |
| MoLAC17A | 0.00000 | 21.12668  | r2 vs l2   | UP   |
| MoLAC17A | 0.00000 | 26.19128  | l16 vs l2  | UP   |
| MoLAC17B | 0.00393 | 9.06086   | r2 vs l2   | UP   |
| MoLAC17B | 0.00755 | -9.28498  | e2 vs r2   | DOWN |
| MoLAC17C | 0.00203 | 8.70164   | r2 vs l2   | UP   |
| MoLAC17C | 0.00819 | -8.12403  | e2 vs r2   | DOWN |
| MoLAC17D | 0.00182 | -9.52888  | e2 vs r2   | DOWN |
| MoLAC17D | 0.01104 | -5.66155  | e16 vs l16 | DOWN |
| MoLAC17D | 0.01149 | -6.27945  | r16 vs l16 | DOWN |
| MoLAC17D | 0.03520 | -6.82126  | r16 vs r2  | DOWN |
| MoLAC17E | 0.00295 | 7.78954   | r2 vs l2   | UP   |
| MoLAC17E | 0.00917 | -5.86836  | e16 vs l16 | DOWN |
| MoLAC17E | 0.01159 | -7.20640  | e2 vs r2   | DOWN |
| MoLAC17F | 0.00000 | 20.69944  | e2 vs l2   | UP   |
| MoLAC17F | 0.00000 | 26.38554  | r2 vs l2   | UP   |
| MoLAC17F | 0.00000 | 21.67144  | l16 vs l2  | UP   |
| MoLAC17G | 0.00000 | 25.49176  | r2 vs l2   | UP   |
| MoLAC17G | 0.00000 | 25.06927  | l16 vs l2  | UP   |
| MoLAC17G | 0.00000 | 22.00275  | e2 vs l2   | UP   |
| MoLAC17H | 0.00000 | -24.85875 | e2 vs r2   | DOWN |
| MoLAC17H | 0.00000 | 22.80547  | l16 vs l2  | UP   |
| MoLAC17H | 0.00000 | 24.26372  | r2 vs l2   | UP   |
| MoLAC17H | 0.00000 | 19.80459  | e16 vs e2  | UP   |
| MoLAC4A  | 0.01059 | 6.69037   | e2 vs l2   | UP   |

|         |         |           |            |      |
|---------|---------|-----------|------------|------|
| MoLAC4A | 0.04884 | -3.78672  | e16 vs l16 | DOWN |
| MoLAC4A | 0.00001 | 10.89536  | r2 vs l2   | UP   |
| MoLAC4A | 0.00000 | 12.67617  | l16 vs l2  | UP   |
| MoLAC4B | 0.00532 | 7.56786   | l16 vs l2  | UP   |
| MoLAC4B | 0.00845 | 6.13606   | r2 vs l2   | UP   |
| MoLAC4B | 0.01127 | -4.86184  | e16 vs l16 | DOWN |
| MoLAC4B | 0.02636 | -5.74269  | e2 vs r2   | DOWN |
| MoLAC4D | 0.01809 | -5.02734  | e16 vs l16 | DOWN |
| MoLAC4D | 0.01810 | 7.40909   | l16 vs l2  | UP   |
| MoLAC4D | 0.02202 | 5.94669   | r2 vs l2   | UP   |
| MoLAC4D | 0.02852 | -6.35589  | e2 vs r2   | DOWN |
| MoLAC5  | 0.00758 | 4.32074   | e2 vs l2   | UP   |
| MoLAC5  | 0.00001 | 6.95588   | r2 vs l2   | UP   |
| MoLAC7B | 0.00032 | -5.51454  | e16 vs e2  | DOWN |
| MoLAC7B | 0.00502 | -3.58912  | e16 vs l16 | DOWN |
| MoLAC7B | 0.00558 | -4.90892  | e16 vs r16 | DOWN |
| MoLAC7B | 0.01362 | 3.76634   | e2 vs l2   | UP   |
| MoLAC7B | 0.00004 | 5.94557   | r2 vs l2   | UP   |
| MoLAC7C | 0.00250 | -4.88321  | e16 vs l16 | DOWN |
| MoSKU5A | 0.00014 | -7.12740  | e2 vs l2   | DOWN |
| MoSKU5A | 0.00200 | -5.26393  | r16 vs l16 | DOWN |
| MoSKU5A | 0.00888 | -4.80831  | r2 vs l2   | DOWN |
| MoSKU5A | 0.00004 | -6.49165  | e16 vs l16 | DOWN |
| MoSKU5B | 0.00106 | -6.30297  | e2 vs l2   | DOWN |
| MoSKU5B | 0.00159 | -5.63847  | r16 vs l16 | DOWN |
| MoSKU5B | 0.02842 | -4.25886  | r2 vs l2   | DOWN |
| MoSKU5B | 0.00002 | -7.05039  | e16 vs l16 | DOWN |
| MoSKU5C | 0.00016 | 4.24563   | r16 vs l16 | UP   |
| MoSKU5C | 0.00049 | 3.62396   | e16 vs l16 | UP   |
| MoSKU5C | 0.00000 | 5.71895   | e2 vs l2   | UP   |
| MoSKU5C | 0.00001 | 5.41397   | r2 vs l2   | UP   |
| MoSKU5D | 0.00046 | 3.98785   | e2 vs l2   | UP   |
| MoSKU5D | 0.00196 | -3.69959  | e2 vs r2   | DOWN |
| MoSKU5D | 0.00000 | 7.68744   | r2 vs l2   | UP   |
| MoSKU5D | 0.00006 | 4.03867   | r16 vs l16 | UP   |
| MoSKU5E | 0.00239 | -19.08120 | e16 vs e2  | DOWN |
| MoSKU5E | 0.00000 | 34.93341  | r2 vs l2   | UP   |
| MoSKU5E | 0.00000 | -35.27709 | r16 vs r2  | DOWN |
| MoSKU5E | 0.00000 | 26.81877  | e2 vs l2   | UP   |
| MoSKU5G | 0.02025 | -3.17174  | e2 vs r2   | DOWN |
| MoSKU5G | 0.00005 | 4.80840   | r2 vs l2   | UP   |
| MoTAL1  | 0.00040 | 4.21362   | r2 vs l2   | UP   |
| MoTAL1  | 0.04494 | 2.74670   | e16 vs e2  | UP   |
| MoTAL1  | 0.00003 | -5.32829  | e2 vs r2   | DOWN |

|        |         |          |            |      |
|--------|---------|----------|------------|------|
| MoTAL2 | 0.00148 | -2.64807 | e2 vs l2   | DOWN |
| MoTAL2 | 0.03563 | -2.20624 | e16 vs r16 | DOWN |
| MoTAL2 | 0.00006 | -3.51313 | e2 vs r2   | DOWN |
| MoTAL3 | 0.00017 | -3.09403 | e16 vs l16 | DOWN |
| MoTAL3 | 0.00315 | 2.89164  | r2 vs l2   | UP   |
| MoTAL3 | 0.01762 | -2.80856 | r16 vs r2  | DOWN |
| MoTAL3 | 0.03310 | -2.34263 | e16 vs e2  | DOWN |
| MoTAL3 | 0.04635 | -1.87878 | r16 vs l16 | DOWN |
| MoTAL4 | 0.00016 | -4.85749 | e2 vs l2   | DOWN |
| MoTAL4 | 0.01492 | -3.70720 | e16 vs e2  | DOWN |
| MoTAL4 | 0.00000 | -7.54435 | r16 vs l16 | DOWN |
| MoTAL4 | 0.00000 | -9.00244 | e16 vs l16 | DOWN |
| MoTAL4 | 0.00000 | -7.38992 | r2 vs l2   | DOWN |
| MoTAL6 | 0.00743 | -8.20077 | e2 vs r2   | DOWN |
| MoTAL6 | 0.02902 | -7.56615 | e16 vs r16 | DOWN |
| MoTAL6 | 0.04355 | 6.47068  | e2 vs l2   | UP   |
| MoTAL6 | 0.00001 | 11.51313 | r16 vs l16 | UP   |
| MoTAL6 | 0.00000 | 14.67145 | r2 vs l2   | UP   |
| MoTAL7 | 0.00088 | -3.32183 | e16 vs l16 | DOWN |
| MoTAL7 | 0.00425 | 3.39259  | r2 vs l2   | UP   |
| MoTAL7 | 0.03127 | 3.21731  | l16 vs l2  | UP   |

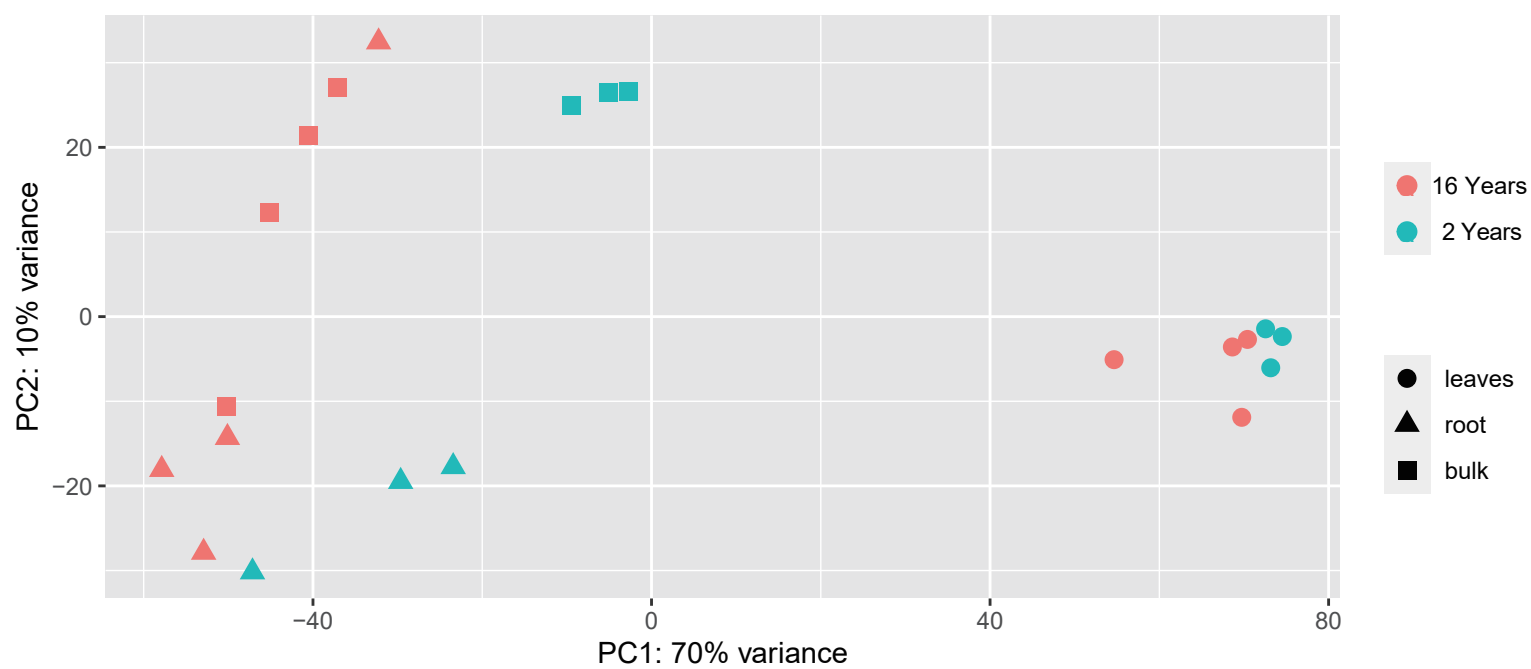

Figure S1 Principal Component Analysis between tissues and ages.



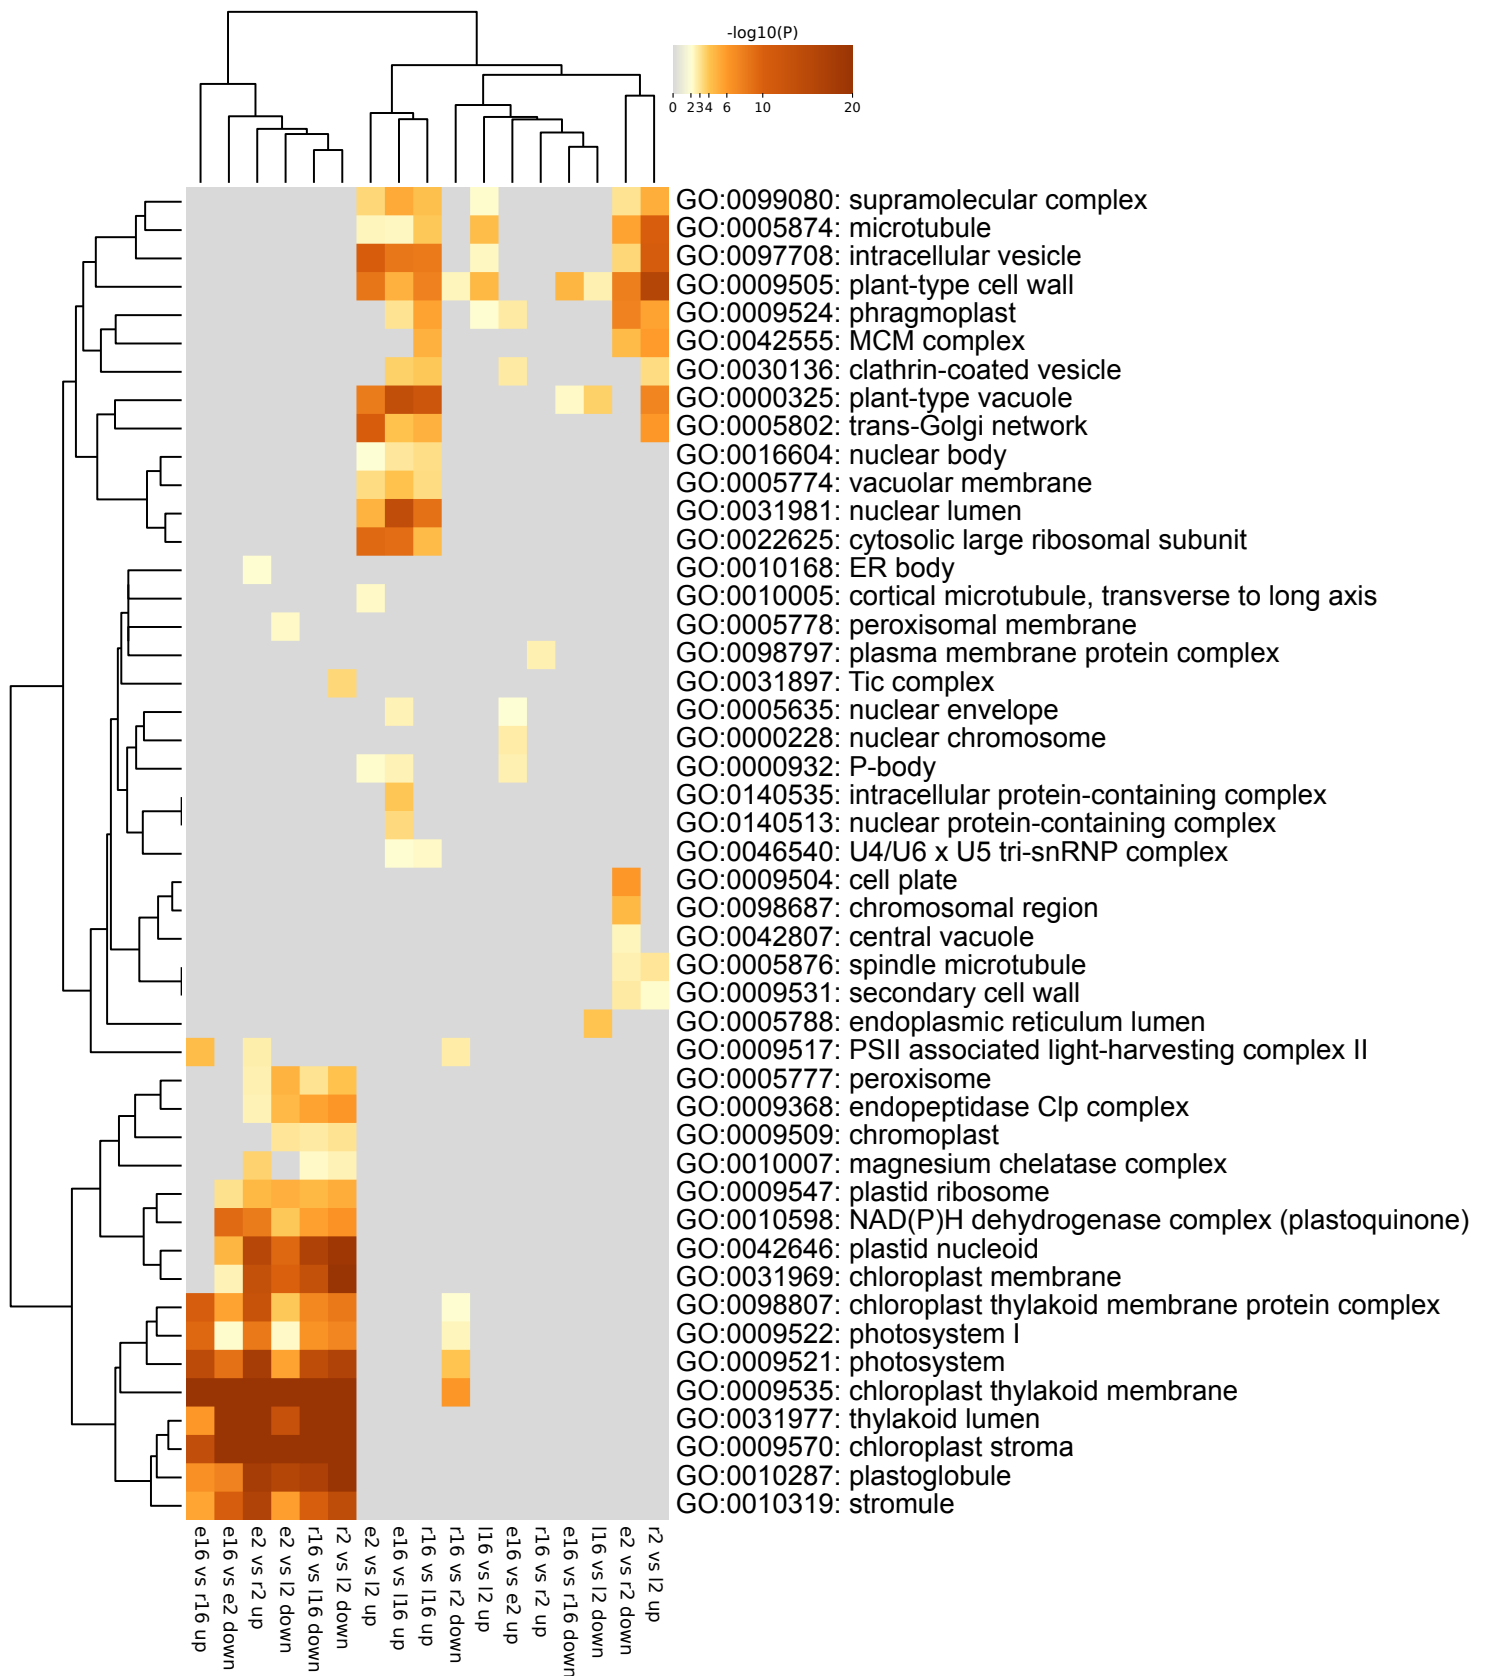

Figure S3 GO Enrichment Analysis in Cellular Components.





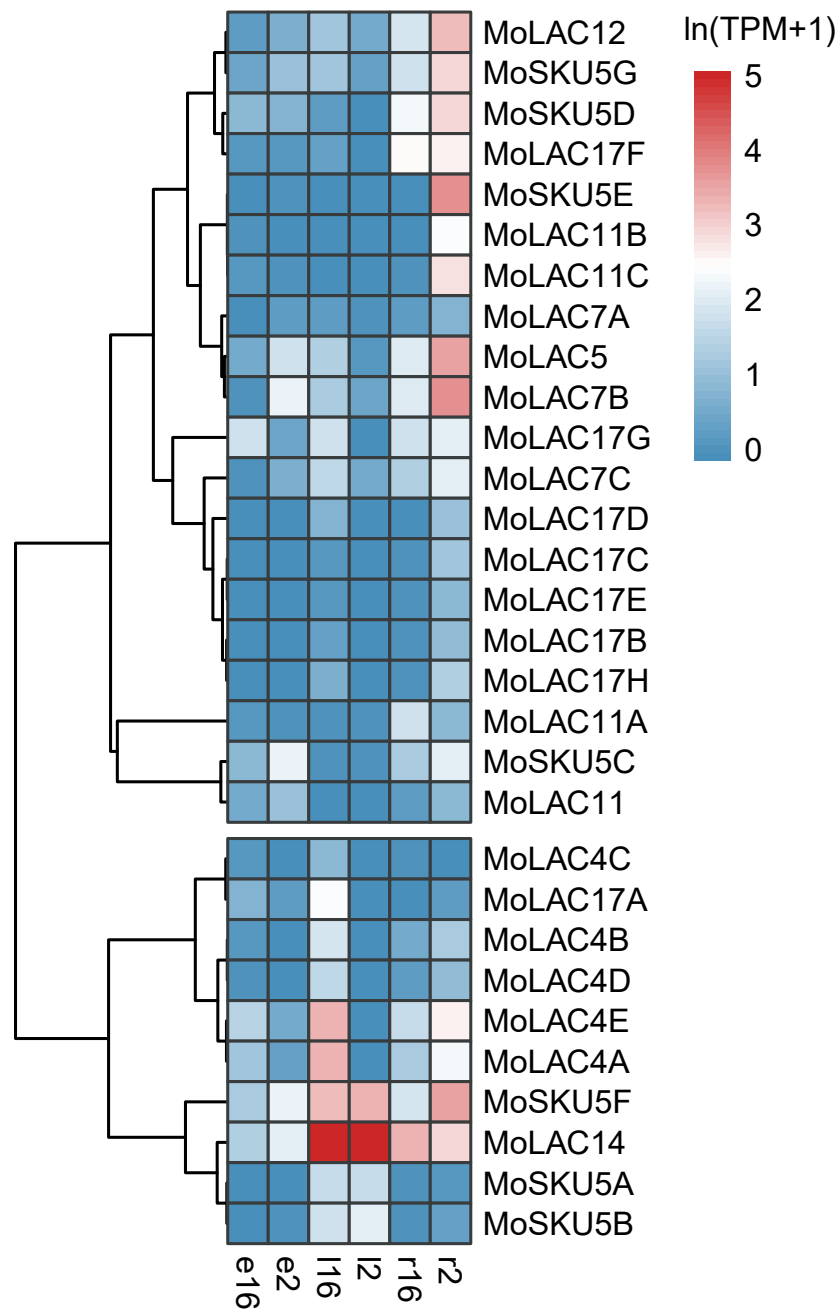

Figure S5 30 potential laccase genes identified in *M. officinalis* by transcriptome analysis.



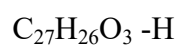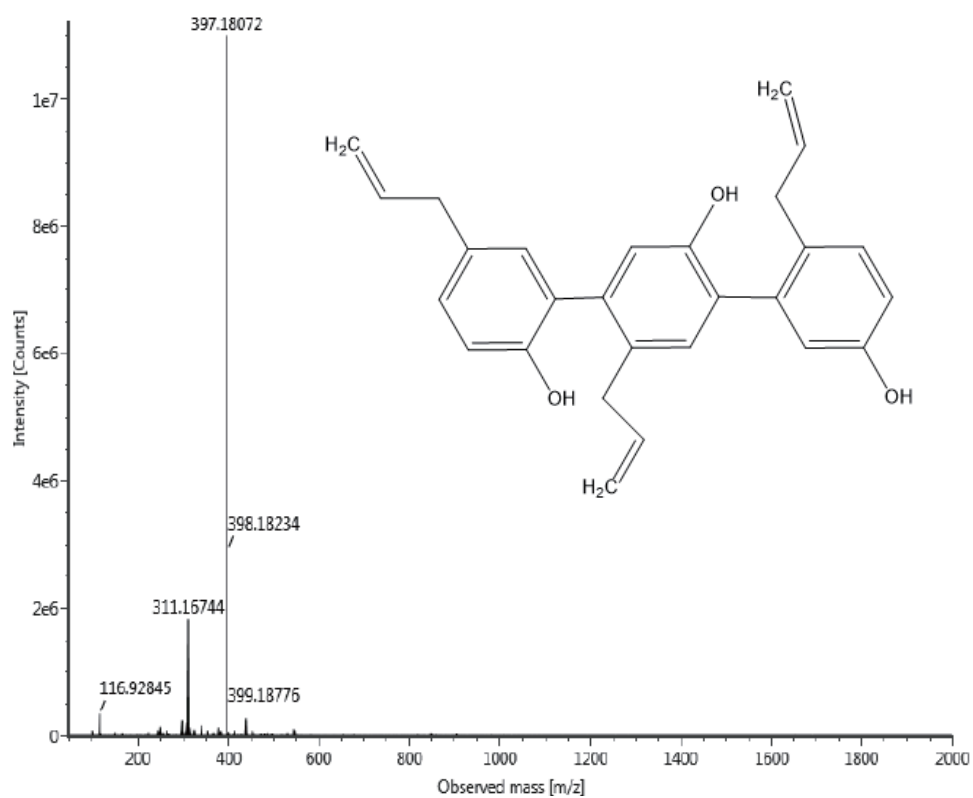

Figure S7 MS analysis of the by-product. Its Molecular formula was  $\text{C}_{27}\text{H}_{26}\text{O}_3$  (RT= 13.8 min), hypothesized to be the trimer Dunnianol or its isomer, derived from chavicol.

A

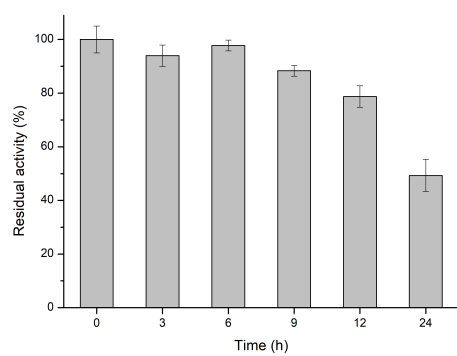

B

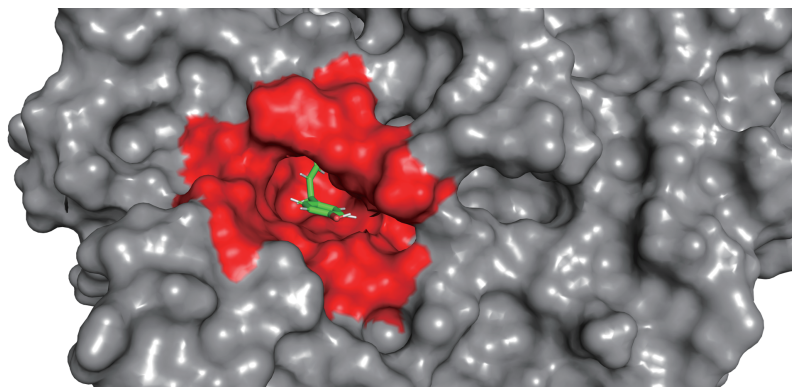

Figure S8 The influence of heat treatment time on thermal stability and Alanine scanning of residues within 5 Å of the substrate for MoLAC14.

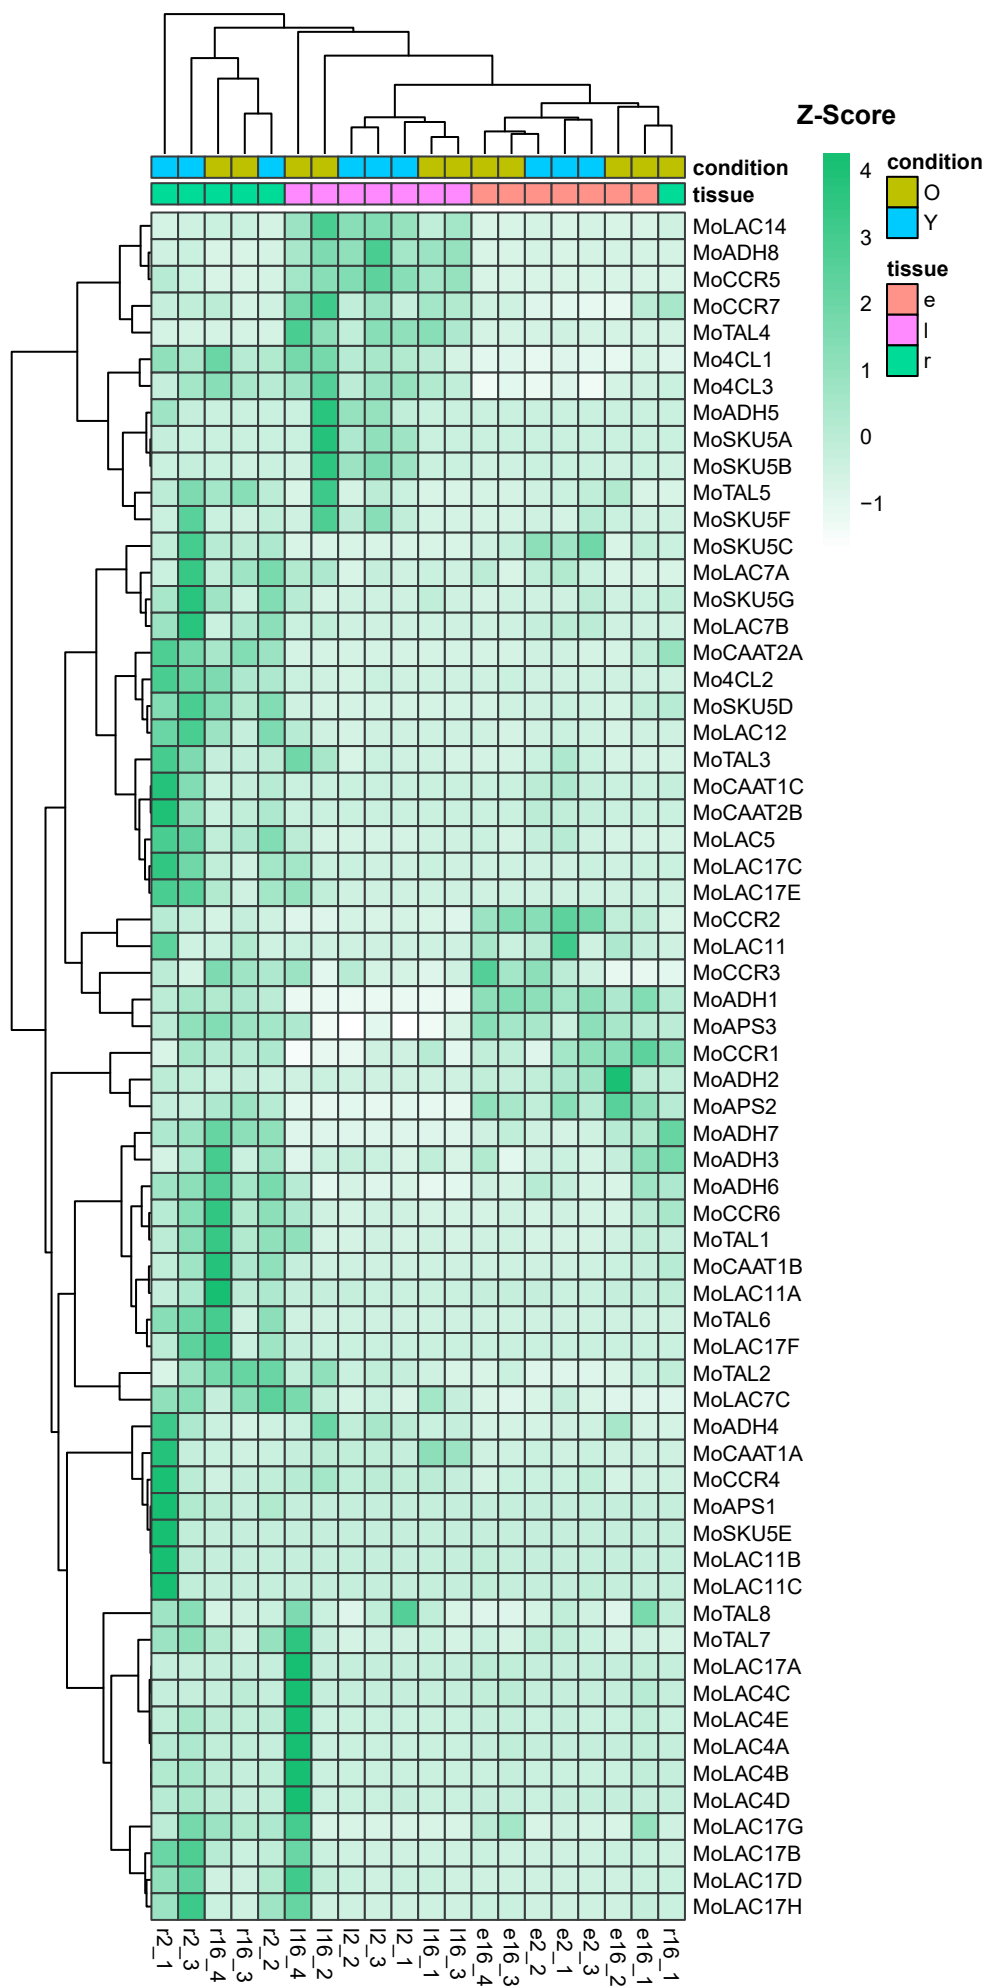

Figure S9 Genes with multiple copies involved in the synthesis from tyrosine to magnolol.
